# Supplementary material for: Sequence-Specific Capture of Protein-DNA Complexes for Mass Spectrometric Protein Identification
Source: PLoS One. 2011 Oct 20;6(10):e26217. doi: 10.1371/journal.pone.0026217 (PMC3197616; doi:10.1371/journal.pone.0026217)
Supplement: Table S2 — The effects of cross-linking and cross-linking reversal on mass spectrometric analysis of the FoxO1-DNA complex using the SRM assay. (DOC) [file pone.0026217.s018.doc]

**Table S2. The effects of cross-linking and cross-linking reversal on mass spectrometric analysis of the FoxO1-DNA complex using the SRM assay.**

| **Peptide** | | **NAWGNLSYADLITK** | | **SVPYFK** | |
| --- | --- | --- | --- | --- | --- |
| **(fmol)** | **Average** | **(fmol)** | **Average** |
| **Non-Cross-linked** | **Prep 1** | **32.40** | **32.74±0.76** | **61.04** | **61.60±0.69** |
| **33.02** | **61.85** |
| **33.30** | **61.25** |
| **Prep 2** | **31.33** | **61.02** |
| **33.23** | **61.56** |
| **33.14** | **62.85** |
| **Cross-linked** | **Prep 1** | **25.44** | **26.50±0.63** | **71.35** | **61.95±10.25** |
| **26.62** | **71.31** |
| **26.49** | **71.18** |
| **Prep 2** | **26.28** | **52.34** |
| **27.31** | **51.71** |
| **26.86** | **53.78** |
| **Cross-linking Reversed** | **Prep 1** | **0.63** | **0.58±0.19** | **4.15** | **5.22±1.10** |
| **0.84** | **4.22** |
| **0.38** | **4.34** |
| **Prep 2** | **0.76** | **5.98** |
| **0.42** | **6.05** |
| **0.44** | **6.58** |
